# Supplementary material for: Fotemustine in recurrent high‑grade glioma: MRI neuro‑radiological findings
Source: PubMed Central journal article supplement — Oncol Lett. 2024 Sep 27;28(6):570. doi: 10.3892/ol.2024.14703 (PMC11465436; doi:10.3892/ol.2024.14703), 2024-09-27
Supplement: Supplementary_Data2.pdf [file Supplementary_Data2.pdf]

Table SI. Demographics and clinical characteristics of each patient.

| Patient no. | Sex | Age at first surgery, years | Histology                    | IDH mutation | MGMTp met | Other treatment | Age at start of FTM, years | FTM                           |                             |                                 | survival after FTM start, months | Survival after FTM end, months | Comorbidity  |
|-------------|-----|-----------------------------|------------------------------|--------------|-----------|-----------------|----------------------------|-------------------------------|-----------------------------|---------------------------------|----------------------------------|--------------------------------|--------------|
|             |     |                             |                              |              |           |                 |                            | First reason for interruption | Duration of therapy, months | Survival from diagnosis, months |                                  |                                |              |
| 1           | F   | 58                          | GBM                          | 0            | 1         | None            | 59                         | AE                            | 2.3                         | 11                              | 4                                | 2                              | None         |
| 2           | M   | 42                          | GBM                          | 0            | 1         | 4 surgeries     | 44                         | NA                            | 6.8                         | 39                              | 15                               | 8                              | None         |
| 3           | M   | 71                          | GBM                          | 0            | 1         | None            | 72                         | NA                            | 7.4                         | 17                              | 10                               | 2                              | None         |
| 4           | M   | 38                          | Grade IV astrocytoma IDH mut | 1            | 0         | CK              | 40                         | PD                            | 2.5                         | 22                              | 4                                | 1                              | None         |
| 5           | M   | 48                          | GBM                          | 0            | 1         | None            | 49                         | NA                            | 7.1                         | 72                              | 48                               | 41                             | None         |
| 6           | F   | 51                          | GBM                          | 0            | NK        | CK              | 54                         | NA                            | 7.8                         | 65                              | 24                               | 16                             | None         |
| 7           | F   | 47                          | GBM                          | 0            | 1         | None            | 49                         | AE                            | 0.7                         | 23                              | 5                                | 4                              | Osteoporosis |
| 8           | M   | 34                          | GBM                          | 0            | 1         | None            | 35                         | PD                            | 6.3                         | 24                              | 11                               | 5                              | None         |
| 9           | M   | 44                          | GBM                          | 0            | 0         | None            | 46                         | PD                            | 1.9                         | 31                              | 5                                | 3                              | None         |
| 10          | M   | 61                          | GBM                          | 0            | 1         | CK              | 62                         | PD                            | 3.8                         | 19                              | 5                                | 2                              | None         |
| 11          | F   | 23                          | GBM                          | 0            | 0         | None            | 23                         | AE                            | 5.6                         | 15                              | 14                               | 8                              | None         |
| 12          | F   | 65                          | GBM                          | 0            | 0         | 2 surgeries     | 66                         | PD                            | 3.5                         | 21                              | 10                               | 6                              | None         |
| 13          | M   | 41                          | GBM                          | 0            | NK        | 3 surgeries     | 45                         | PD                            | 6.4                         | 62                              | 16                               | 10                             | None         |

|    |   |    |                                 |   |    |                  |    |                                                        |     |    |    |    |                      |
|----|---|----|---------------------------------|---|----|------------------|----|--------------------------------------------------------|-----|----|----|----|----------------------|
| 14 | F | 48 | Grade IV astrocytoma<br>IDH mut | 1 | NK | None             | 48 | Therapy changed due to no peripheral venous thrombosis | 5.4 | 24 | 17 | 12 | None                 |
| 15 | M | 44 | GBM                             | 0 | NK | CK               | 45 | PD                                                     | 0.9 | 19 | 4  | 3  | HBP                  |
| 16 | F | 56 | GBM                             | 0 | 1  | 2 surgeries + CK | 61 | AE                                                     | 0.9 | 65 | 4  | 3  | None                 |
| 17 | M | 55 | GBM                             | 0 | 1  | 2 surgeries + CK | 57 | PD                                                     | 2.1 | 27 | 4  | 2  | Breast benign nodule |
| 18 | M | 47 | GBM                             | 0 | 0  | 2 surgeries      | 51 | PD, AE                                                 | 1.5 | 61 | 12 | 10 | None                 |
| 19 | M | 69 | GBM                             | 0 | 1  | None             | 71 | PD                                                     | 4.1 | 29 | 9  | 5  | HBP, ADD             |

ADD; anxiety-depressive disorder; AVNRT, atrial-ventricular nodal reentrant tachycardia; GBM, glioblastoma; CK, cyber-knife; FTM, fotemustine; IDH mut, isocitrate dehydrogenase mutated (0, no; 1, yes); NK, not known; MGMTp met, O<sup>6</sup>-methylguanine-DNA methyltransferase promoter methylation (1, methylated; 0, unmethylated); HBP, high blood pressure; NA, not applicable (indicating the case completed the FTM schedule as planned according to the Addeo schedule); PD, Progressive Disease; AE, adverse event; M, male; F, female.

Table SII. Treatment details and related AEs.

| Patient no. | FTM induction |                                      | FTM maintenance |                                   | Presence | AEscausing FTM interruption<br>AE type (1,<br>hematological; 2,aspartate<br>aminotransferase increase;<br>3, lung embolism) |
|-------------|---------------|--------------------------------------|-----------------|-----------------------------------|----------|-----------------------------------------------------------------------------------------------------------------------------|
|             | Cycles, n     | Dose (R,<br>regular; M,<br>modified) | Cycles, n       | Dose (R, regular;<br>M, modified) |          |                                                                                                                             |
| 1           | 4             | M <sup>a</sup>                       | 0               | NA                                | Y        | 1 (leucopenia),<br>3                                                                                                        |
| 2           | 5             | R                                    | 5               | R                                 | N        | NA                                                                                                                          |
| 3           | 5             | R                                    | 4               | M <sup>b</sup>                    | Y        | 1 (leucopenia)                                                                                                              |
| 4           | 4             | R                                    | 0               | NA                                | N        | NA                                                                                                                          |
| 5           | 5             | R                                    | 5               | R                                 | N        | NA                                                                                                                          |
| 6           | 5             | R                                    | 5               | R                                 | N        | NA                                                                                                                          |
| 7           | 3             | R                                    | 0               | NA                                | Y        | 1 (leucopenia)                                                                                                              |
| 8           | 5             | R                                    | 3               | R                                 | N        | NA                                                                                                                          |
| 9           | 5             | R                                    | 0               | NA                                | N        | NA                                                                                                                          |
| 10          | 5             | R                                    | 1               | R                                 | N        | NA                                                                                                                          |
| 11          | 5             | R                                    | 3               | R                                 | Y        | 2                                                                                                                           |
| 12          | 5             | M <sup>a</sup>                       | 0               | NA                                | N        | 1 (leucopenia)                                                                                                              |
| 13          | 5             | R                                    | 3               | R                                 | N        | NA                                                                                                                          |
| 14          | 5             | R                                    | 3               | R                                 | N        | NA                                                                                                                          |
| 15          | 3             | R                                    | 0               | NA                                | N        | NA                                                                                                                          |
| 16          | 3             | R                                    | 0               | NA                                | Y        | 1 (leucopenia)                                                                                                              |
| 17          | 5             | R                                    | 0               | NA                                | N        | NA                                                                                                                          |
| 18          | 4             | R                                    | 0               | NA                                | Y        | 1 (leucopenia,<br>thrombocytopenia)                                                                                         |
| 19          | 4             | M <sup>b</sup>                       | 0               | NA                                | Y        | 1 (thrombocytopenia)                                                                                                        |

AE, adverse event; FTM schedule modification: <sup>a</sup>Postponed FTM dose; <sup>b</sup>FTM dose reduction. FTM, fotemustine; Y, yes; N, no; NA, not applicable.

Table SIII. Volume and ADC values at baseline and follow-up, and relative percentage change.

| Patient no. | Baseline                       |                                                            | Follow-up                   |                                                            | Difference vol,<br>% | Difference ADC,<br>% | Classification according<br>to RANO criteria |
|-------------|--------------------------------|------------------------------------------------------------|-----------------------------|------------------------------------------------------------|----------------------|----------------------|----------------------------------------------|
|             | Volume CET,<br>mm <sup>3</sup> | ADC <sup>10</sup> , x10 <sup>-3</sup> mm <sup>2</sup> /sec | Volume CET, mm <sup>3</sup> | ADC <sup>10</sup> , x10 <sup>-3</sup> mm <sup>2</sup> /sec |                      |                      |                                              |
| 1           | 15227                          | 0.888                                                      | 13724                       | 0.832                                                      | -10                  | -6                   | SD                                           |
| 2           | 0                              | 1.197                                                      | 4354                        | 1.241                                                      | NA <sup>a</sup>      | 4                    | PD                                           |
| 3           | 1844                           | 1.008                                                      | 2556                        | 1.412                                                      | 39                   | 40                   | PD                                           |
| 4           | 6459                           | 0.036                                                      | 9271                        | 0.698                                                      | 44                   | 1843                 | PD                                           |
| 5           | 0                              | 0.998                                                      | 288                         | 0.766                                                      | NA <sup>a</sup>      | -23                  | PD                                           |
| 6           | 2216                           | 0.824                                                      | 294                         | 1.061                                                      | -87                  | 29                   | PR                                           |
| 7           | 30380                          | 0.852                                                      | 13280                       | 0.929                                                      | -56                  | 9                    | PR                                           |
| 8           | 8858                           | 1.091                                                      | 59680                       | 1.196                                                      | 574                  | 10                   | PD                                           |
| 9           | 689                            | 1.060                                                      | 85760                       | 0.973                                                      | 12347                | -8                   | PD                                           |
| 10          | 3878                           | 0.875                                                      | 4557                        | 1.215                                                      | 18                   | 39                   | SD                                           |
| 11          | 76                             | 1.276                                                      | 735                         | 1.106                                                      | 867                  | -13                  | PD                                           |
| 12          | 46                             | 0.891                                                      | 25                          | 1.271                                                      | -46                  | 43                   | SD                                           |
| 13          | 1206                           | 1.164                                                      | 7130                        | 1.152                                                      | 491                  | -1                   | PD                                           |
| 14          | 27169                          | 0.250                                                      | 9539                        | 0.264                                                      | -65                  | 6                    | PR                                           |
| 15          | 920                            | 1.111                                                      | 19670                       | 0.926                                                      | 2038                 | -17                  | PD                                           |
| 16          | 21120                          | 1.093                                                      | 9934                        | 0.759                                                      | -53                  | -31                  | PR                                           |
| 17          | 22721                          | 1.131                                                      | 54713                       | 1.041                                                      | 141                  | -8                   | PD                                           |
| 18          | 11110                          | 0.991                                                      | 9178                        | 0.989                                                      | -17                  | 0                    | SD                                           |
| 19          | 846                            | 1.182                                                      | 60450                       | 0.915                                                      | 7045                 | -23                  | PD                                           |

<sup>a</sup>Since the baseline volume was 0, the percentage change in volume was not computable. ADC<sup>10</sup>, tenth percentile of Apparent Diffusion Coefficient; CET, Contrast-Enhancing Tumors; vol, volume; NA, not available. RANO, Response Assessment in Neuro-Oncology (26); PD, progressive disease; SD, stable disease; PR, partial response.

Table SIV. Comparison of radiological changes and disease control rate after FTM treatment according to MGMTp methylation status.

| Characteristic                      | MGMTp methylated<br>(n=10) | MGMTp unmethylated<br>(n=5) | P-value |
|-------------------------------------|----------------------------|-----------------------------|---------|
| CET volume difference, %            |                            |                             |         |
| median                              | +28%                       | +43%                        | 0.622   |
| IQR                                 | -21% to +249%              | -17% to +867%               |         |
| range                               | -56% to +7045%             | -46% to +12347%             |         |
| ADC <sup>10</sup> difference, %     |                            |                             |         |
| median                              | -1%                        | 0%                          | 0.513   |
| IQR                                 | -19% to +9%                | -8% to +43%                 |         |
| range                               | -31% to +40%               | -13% to 1843%               |         |
| RANO classification, n. of patients |                            |                             |         |
| PR                                  | 6                          | 3                           | -       |
| SD                                  | 2                          | 2                           |         |
| PR                                  | 2                          | 0                           |         |
| DCR, %                              | 40%                        | 40%                         | -       |

P-values were computed with Mann-Whitney test. CET, Contrast-Enhancing Tumor; IQR, interquartile range; ADC<sup>10</sup>, 10th percentile of apparent diffusion coefficient; MGMTp, O(6)-methylguanine-DNA methyltransferase promotor; RANO, Response Assessment in Neuro-Oncology; PD, Progressive Disease; SD, Stable Disease; PR, Partial Response; DCR, Disease Control Rate.
